# Supplementary material for: Perfluoroalkyl Substances (PFASs) in Rivers and Drinking Waters from Qingdao, China
Source: MDPI journal article supplement (doi:10.3390/ijerph19095722), 2022-05-08
Supplement: s1 [file s1]

## Supplementary Information-Table S1-S4

**Table S1.** Information on surface water samples in Qingdao.

| Field No. | Latitude  | Longitude  | Location                                                | Description                                            |
|-----------|-----------|------------|---------------------------------------------------------|--------------------------------------------------------|
| W1        | 36°05'47" | 120°22'43" | The Haibo River, Liaoyuan Road, Shibei District         | Residential area                                       |
| W2        | 36°06'16" | 120°20'03" | The Haibo River, Hai'an Road, Shibei District           | Residential area                                       |
| W3        | 36°06'27" | 20°19'42"  | The Haibo River, Hang'an Road, Shibei District          | Harbor                                                 |
| W4        | 36°07'30" | 120°26'03" | The Zhangcun River, Zhuzhou Road, Laoshan District      | Sourounded by furniture workshops                      |
| W5        | 36°08'29" | 120°28'47" | The Zhangcun River, Songling Road, Laoshan District     | Sub-urban area                                         |
| W6        | 36°09'56" | 120°30'4"  | The Zhangcun River, Jiushui East Road, Laoshan District | Near China Ocean University                            |
| W7        | 36°11'14" | 120°30'53" | The Zhangcun River, Laoshan District                    | Sub-urban area                                         |
| W8        | 36°11'56" | 120°32'5"  | Kuang Chuan Reservoir, Laoshan District                 | Drinking water source, upper end of the Zhangcun River |
| W9        | 36°11'3"  | 120°28'55" | The Licun River, Licun River Park, Licang District      | Near a public park                                     |
| W10       | 36°11'1"  | 120°28'10" | The Licun River, Licang District                        | Rural area                                             |
| W11       | 36°9'49"  | 120°28'4"  | The Licun River, Licang District                        | Rural area                                             |
| W12       | 36°9'39"  | 120°26'55" | The Licun River, Licang District                        | Rural area. Sourounded by villages                     |
| W13       | 36°15'24" | 120°28'20" | Laoshan Reservoir, Chengyang District                   | Drinking water source site                             |
| W14       | 36°14'57" | 120°23'16" | The Baisha river, Chengyang District                    | Rural area                                             |
| W15       | 36°15'59" | 120°24'57" | The Baisha river, Chengyang District                    | Rural area                                             |
| W16       | 36°15'12" | 120°20'8"  | The Baisha river, Chengyang District                    | Rural area. Surrounded by villages                     |
| W17       | 36°21'13" | 120°24'59" | The Moshui River, Chengyang District                    | Rural area.                                            |
| W18       | 36°18'38" | 120°20'59" | The Moshui River, Chengyang District                    | Rural area with plastic & printing factories           |
| W19       | 36°17'30" | 120°19'27" | The Moshui River, Chengyang District                    | Rural area.                                            |
| W20       | 36°16'25" | 120°19'19" | The Moshui River, Chengyang District                    | Rural area influenced by the seawater flowing backward |
| W21       | 36°15'48" | 120°17'41" | The Hongjiang River Estuary, Chengyang District         | Rural area influenced by the seawater flowing backward |
| W22       | 36°17'21" | 120°17'5"  | The Hongjiang River, Chengyang District                 | Rural area.                                            |

|     |           |            |                                                                 |                                                          |
|-----|-----------|------------|-----------------------------------------------------------------|----------------------------------------------------------|
| W23 | 36°09'0"  | 120°24'46" | The Licun River,, Licang District                               | Residential area with nearly stagnant water flow         |
| W24 | 36°09'3"  | 120°22'29" | The Licun River, Shibei District                                | The entrance of the Jiaozhou Bay Cross-sea Bridge        |
| W25 | 36°09'12" | 120°22'47" | The Licun River, Shibei District                                | Under the land part of the Jiaozhou Bay Cross-sea Bridge |
| W26 | 36°08'25" | 120°23'56" | The Zhangcun River, Shibei District                             | Near a WWTP                                              |
| W27 | 36°08'47" | 120°23'51" | The Licun River, Shibei District, joint with the Zhangcun River | Near a WWTP                                              |

**Table S2:** Information on drinking water and groundwater samples from Qingdao

| Field No. | Sample type         | Sampling sites                                               | Producers and brand                                  |
|-----------|---------------------|--------------------------------------------------------------|------------------------------------------------------|
| TW1       | Tapwater            | 90 Dunhua Road, Carrefour, Shibei District                   | Qingdao Water Group Co. Ltd.                         |
| TW2       | Tapwater            | Longkou Village, Jiushui East Road, Laoshan District         | Qingdao Water Group Co. Ltd.                         |
| TW3       | Tapwater            | Licun River Park, Licang District                            | Qingdao Water Group Co. Ltd.                         |
| TW4       | Tapwater            | 20 Xiata Road, Chengyang District                            | Qingdao Water Group Co. Ltd.                         |
| TW5       | Tapwater            | Campus of Qingdao Agriculture University, Chengyang District | Qingdao Water Group Co. Ltd.                         |
| TW6       | Tapwater            | 308 Ningxia Road, Qingdao University, Shinan District        | Qingdao Water Group Co. Ltd.                         |
| TW7       | Tapwater            | Beach Park, Chongming Island Road, Huangdao District         | Qingdao Water Group Co. Ltd.                         |
|           |                     |                                                              |                                                      |
| MW1       | Mineral water       | 90 Dunhua Road, Carrefour, Shibei District                   | Red bottle, Laoshan Mineral Water Co. Ltd.           |
| MW2       | Mineral water       | 90 Dunhua Road, Carrefour, Shibei District                   | Blue bottle, Laoshan Mineral Water Co. Ltd.          |
| MW3       | Mineral water       | 90 Dunhua Road, Carrefour, Shibei District                   | Lanke Mineral Water Co. Ltd.                         |
|           |                     |                                                              |                                                      |
| BW1       | Barreled pure water | Qing-Yin Highway Bridge, Shenzhen Road, Laoshan District     | Produced in local residential quarters               |
| BW2       | Barreled pure water | 369 Hexing Road, Laoshan District                            | Produced in local residential quarters               |
| BW3       | Barreled pure water | Qingdao Agriculture University, Chengyang District           | Produced by Qingdao Ganlu Spring Co. Ltd.            |
| BW4       | Barreled pure water | 59 Hexing Road, Wangjia Plaza, Shibei District               | Produced in restaurants                              |
| BW5       | Barreled pure water | Huangdingshan Road, Huangdao District                        | Produced by Laoshan Branch, Qingdao Zhichun Beverage |
| BW6       | Barreled pure water | 308 Ningxia Road, Qingdao University, Shinan District        | Qingdao Beer & Beverage Co. Ltd.                     |
|           |                     |                                                              |                                                      |

|     |             |                                                               |                                   |
|-----|-------------|---------------------------------------------------------------|-----------------------------------|
| GW1 | Groundwater | Qingdao Jinrui Wood Co. Ltd., Shenzhen Road, Laoshan District | Depth: 10 m. Not use for drinking |
| GW2 | Groundwater | 396 Songling Road, Laoshan District                           | Depth: 6 m. Not used for drinking |
| GW3 | Groundwater | 995 Xiazhuang Village, Chengyang District                     | Depth: 9 m. Used for drinking     |

**Table S3** The precursor and product ions in mass spectrometry, the limits of quantification (LOQs), recoveries, and the repeatability of matrix spike recoveries for individual PFASs in water samples

| Compounds | Precursor ions | Product ions | Blank (ng/L) |           | LOQ (ng/L) | Matrix Recovery (n=11) |         |
|-----------|----------------|--------------|--------------|-----------|------------|------------------------|---------|
|           | (m/z)          | (m/z)        | Travelling   | Procedure |            | Mean (%)               | RSD (%) |
| PFBA      | 212.8          | 212.8        | <0.05        | <0.1      | 0.1        | 93.9                   | 4.8     |
| PFPeA     | 262.8          | 262.8        | <0.05        | <0.1      | 0.2        | 85.9                   | 3.0     |
| PFHxA     | 313            | 313          | <0.05        | <0.1      | 0.2        | 87.0                   | 3.3     |
| PFHpA     | 363            | 363          | <0.05        | <0.1      | 0.5        | 97.1                   | 3.6     |
| PFOA      | 412.8          | 412.8        | <0.05        | <0.1      | 0.1        | 86.8                   | 2.4     |
| PFNA      | 462.8          | 462.8        | <0.05        | <0.1      | 0.1        | 88.3                   | 1.8     |
| PFDA      | 512.8          | 512.8        | <0.05        | <0.1      | 0.5        | 90.1                   | 1.4     |
| PFUnDA    | 562.8          | 562.8        | <0.05        | <0.1      | 0.2        | 87.4                   | 1.8     |
| PFDoDA    | 612.8          | 612.8        | <0.05        | <0.1      | 0.5        | 83.6                   | 2.9     |
| PFTTrDA   | 662.8          | 662.8        | <0.05        | <0.1      | 0.5        | 81.5                   | 3.2     |
| PFTeDA    | 712.8          | 712.8        | <0.05        | <0.1      | 0.2        | 80.5                   | 3.6     |
| PFHxDA    | 813            | 813          | <0.05        | <0.1      | 0.2        | 79.9                   | 5.2     |
| PFOcDA    | 912.8          | 912.8        | <0.05        | <0.1      | 0.2        | 72.4                   | 3.8     |
| PFBS      | 298.8          | 298.8        | <0.1         | <0.2      | 0.5        | 93.4                   | 2.2     |
| PFHxS     | 398.8          | 398.8        | <0.1         | <0.2      | 0.5        | 93.7                   | 0.9     |
| PFOS      | 499            | 499          | <0.1         | <0.2      | 0.5        | 97.8                   | 4.4     |
| PFDS      | 598.8          | 598.8        | <0.1         | <0.2      | 0.5        | 79.4                   | 3.0     |
| PFOSA     | 498            | 77.8         | <0.05        | <0.1      | 0.05       | 80.7                   | 4.3     |

RSD: relative standard deviation

**Table S4** Concentrations of PFASs in the water samples (ng/L)

| Water type       | Field No. | PFBA         | PFPeA | PFHxA | PFOA  | PFHpA | PFNA | PFDA | PFUnD | PFOS  | PFHxS | PFBS         | PFTriD | PFDoD | PFTeD | PFHxD | PFOcD | PFDS | PFOSA | ΣPFASs       |
|------------------|-----------|--------------|-------|-------|-------|-------|------|------|-------|-------|-------|--------------|--------|-------|-------|-------|-------|------|-------|--------------|
| River water      |           |              |       |       |       |       |      |      |       |       |       |              |        |       |       |       |       |      |       |              |
| The Haibo River  | W1        | 17.60        | 3.91  | 4.04  | 19.44 | 2.12  | 0.39 | <0.5 | <0.2  | 2.24  | 2.28  | 50.40        | <0.5   | <0.5  | <0.2  | <0.2  | <0.2  | <0.5 | <0.1  | <b>102.6</b> |
|                  | W2        | 21.00        | 4.60  | 3.79  | 38.00 | 2.54  | 0.42 | <0.5 | <0.2  | 5.00  | 9.40  | 36.60        | <0.5   | <0.5  | <0.2  | <0.2  | <0.2  | <0.5 | 3.12  | <b>124.7</b> |
|                  | W3        | 8.68         | 3.22  | 2.52  | 15.36 | 1.36  | 0.27 | <0.5 | <0.2  | 1.06  | 2.36  | 13.88        | <0.5   | <0.5  | <0.2  | <0.2  | <0.2  | <0.5 | 0.28  | <b>49.0</b>  |
| The Zhangcun     | W7        | 12.64        | 3.90  | 2.91  | 11.04 | 1.60  | <0.1 | <0.5 | <0.2  | 0.00  | 33.84 | 11.40        | <0.5   | <0.5  | <0.2  | <0.2  | <0.2  | <0.5 | <0.1  | <b>77.4</b>  |
|                  | W6        | 13.68        | 2.42  | 2.16  | 12.64 | 2.07  | 0.34 | <0.5 | <0.2  | 0.54  | 1.34  | <b>256.8</b> | <0.5   | <0.5  | <0.2  | <0.2  | <0.2  | <0.5 | <0.1  | <b>292.2</b> |
|                  | W5        | 12.12        | 2.77  | 2.39  | 14.56 | 2.81  | 0.54 | <0.5 | <0.2  | 0.78  | 1.23  | 51.20        | <0.5   | <0.5  | <0.2  | <0.2  | <0.2  | <0.5 | <0.1  | <b>88.6</b>  |
|                  | W4        | 19.92        | 3.39  | 2.84  | 23.40 | 2.44  | 0.52 | <0.5 | <0.2  | 1.24  | 1.85  | 32.40        | <0.5   | <0.5  | <0.2  | <0.2  | <0.2  | <0.5 | <0.1  | <b>88.3</b>  |
|                  | W26       | 22.52        | 2.64  | 5.16  | 7.04  | 4.88  | <0.1 | <0.5 | <0.2  | 0.51  | 1.00  | 7.88         | <0.5   | <0.5  | <0.2  | <0.2  | <0.2  | <0.5 | <0.1  | <b>51.8</b>  |
| The Licun River  | W9        | 10.00        | 1.40  | 1.13  | 8.88  | 1.52  | 0.20 | <0.5 | <0.2  | 0.06  | 0.40  | 4.64         | <0.5   | <0.5  | <0.2  | <0.2  | <0.2  | <0.5 | <0.1  | <b>28.3</b>  |
|                  | W10       | 17.52        | 3.33  | 2.79  | 24.00 | 4.04  | 0.56 | <0.5 | <0.2  | 0.30  | 0.99  | 8.24         | <0.5   | <0.5  | <0.2  | <0.2  | <0.2  | <0.5 | <0.1  | <b>62.1</b>  |
|                  | W11       | 17.64        | 3.43  | 3.30  | 21.60 | 4.04  | 0.70 | <0.5 | <0.2  | 0.66  | 1.59  | 15.40        | <0.5   | <0.5  | <0.2  | <0.2  | <0.2  | <0.5 | <0.1  | <b>68.7</b>  |
|                  | W12       | 18.56        | 4.20  | 3.32  | 27.20 | 3.65  | 1.08 | <0.5 | <0.2  | 1.39  | 2.21  | 20.80        | <0.5   | <0.5  | <0.2  | <0.2  | <0.2  | <0.5 | <0.1  | <b>82.9</b>  |
|                  | W23       | 19.76        | 7.36  | 6.96  | 36.40 | 11.72 | 3.16 | 2.46 | 0.60  | 3.65  | 3.67  | 19.60        | <0.5   | <0.5  | <0.2  | <0.2  | <0.2  | <0.5 | 0.92  | <b>116.3</b> |
|                  | W27       | <b>41.60</b> | 4.44  | 8.84  | 15.92 | 5.28  | 0.32 | <0.5 | 0.23  | 1.36  | 0.86  | 11.72        | <0.5   | <0.5  | <0.2  | <0.2  | <0.2  | <0.5 | <0.1  | <b>90.9</b>  |
|                  | W25       | 17.88        | 3.93  | 3.58  | 22.60 | 3.26  | 0.89 | 0.58 | <0.2  | 1.10  | 5.80  | 40.00        | <0.5   | <0.5  | <0.2  | <0.2  | <0.2  | <0.5 | <0.1  | <b>99.6</b>  |
|                  | W24       | 13.36        | 4.68  | 3.77  | <0.1  | <0.5  | <0.1 | <0.5 | <0.2  | 0.76  | 0.04  | 17.08        | <0.5   | <0.5  | <0.2  | <0.2  | <0.2  | <0.5 | <0.1  | <b>39.8</b>  |
| The Baisha River | W15       | 15.68        | 4.76  | 4.00  | 15.00 | 3.66  | 0.92 | 0.58 | 0.30  | 2.06  | 0.92  | 17.40        | <0.5   | <0.5  | <0.2  | <0.2  | <0.2  | <0.5 | <0.1  | <b>65.3</b>  |
|                  | W14       | 19.32        | 6.24  | 4.40  | 72.40 | 4.96  | 1.30 | 0.52 | <0.2  | 2.03  | 0.61  | 14.36        | <0.5   | <0.5  | <0.2  | <0.2  | <0.2  | <0.5 | <0.1  | <b>126.1</b> |
|                  | W16       | 10.28        | 7.60  | 5.56  | 29.20 | 4.88  | 1.15 | 0.77 | 0.25  | 9.92  | 1.37  | 22.80        | <0.5   | <0.5  | <0.2  | <0.2  | <0.2  | <0.5 | 0.51  | <b>94.3</b>  |
| The Moshui River | W17       | 22.80        | 22.80 | 30.20 | 57.80 | 12.72 | 5.76 | 4.84 | 0.95  | 15.48 | 3.35  | 25.40        | <0.5   | <0.5  | <0.2  | <0.2  | <0.2  | <0.5 | <0.1  | <b>202.1</b> |

|                        |     |       |       |       |       |       |      |      |      |       |      |       |      |      |      |      |      |      |      |              |
|------------------------|-----|-------|-------|-------|-------|-------|------|------|------|-------|------|-------|------|------|------|------|------|------|------|--------------|
| The Hongjiang          | W18 | 26.20 | 24.84 | 27.80 | 68.40 | 13.68 | 5.52 | 4.20 | 0.71 | 15.28 | 3.44 | 27.96 | <0.5 | <0.5 | <0.2 | <0.2 | <0.2 | <0.5 | <0.1 | <b>218.0</b> |
|                        | W19 | 30.32 | 10.28 | 9.72  | 55.20 | 6.48  | 1.56 | 0.92 | 0.29 | 26.96 | 5.56 | 32.72 | <0.5 | <0.5 | <0.2 | <0.2 | <0.2 | <0.5 | 0.47 | <b>180.5</b> |
|                        | W20 | 8.84  | 7.56  | 8.20  | 21.60 | 3.68  | 1.31 | 0.69 | 0.25 | 3.78  | 0.82 | 7.88  | <0.5 | <0.5 | <0.2 | <0.2 | <0.2 | <0.5 | 0.29 | <b>64.9</b>  |
|                        | W22 | 27.24 | 32.32 | 41.20 | 32.48 | 19.64 | 3.94 | 1.93 | 0.30 | 41.60 | 5.20 | 15.24 | <0.5 | <0.5 | <0.2 | <0.2 | <0.2 | <0.5 | 44.0 | <b>265.1</b> |
|                        | W21 | 24.96 | 18.20 | 25.00 | 33.24 | 15.44 | 2.80 | 1.06 | 0.24 | 25.96 | 5.00 | 16.08 | <0.5 | <0.5 | <0.2 | <0.2 | <0.2 | <0.5 | 13.8 | <b>181.8</b> |
| Groundwater            | GW1 | 5.26  | 0.35  | 0.19  | 3.32  | 0.33  | 0.32 | <0.5 | <0.2 | 4.84  | 0.48 | 4.44  | <0.5 | <0.5 | <0.2 | <0.2 | <0.2 | <0.5 | <0.1 | <b>19.5</b>  |
|                        | GW2 | 1.40  | 0.20  | 0.20  | 0.85  | 0.33  | <0.1 | <0.5 | <0.2 | 0.43  | 0.00 | 1.52  | <0.5 | <0.5 | <0.2 | <0.2 | <0.2 | <0.5 | <0.1 | <b>4.9</b>   |
|                        | GW3 | 0.20  | <0.2  | <0.2  | <0.1  | <0.5  | <0.1 | <0.5 | <0.2 | 0.00  | 0.00 | 0.09  | <0.5 | <0.5 | <0.2 | <0.2 | <0.2 | <0.5 | <0.1 | <b>0.4</b>   |
| Reservoir              | W8  | 16.72 | 2.39  | 2.08  | 12.96 | 2.77  | 0.74 | <0.5 | <0.2 | 0.10  | 0.00 | 1.51  | <0.5 | <0.5 | <0.2 | <0.2 | <0.2 | <0.5 | <0.1 | <b>39.4</b>  |
|                        | W13 | 8.44  | 2.43  | 1.74  | 7.48  | 1.58  | 0.37 | <0.5 | <0.2 | 0.47  | 1.20 | 4.72  | <0.5 | <0.5 | <0.2 | <0.2 | <0.2 | <0.5 | <0.1 | <b>28.6</b>  |
| Tapwater               | TW1 | 5.32  | 1.53  | 1.25  | 6.24  | 1.03  | 0.30 | <0.5 | <0.2 | 1.09  | 3.04 | 1.08  | <0.5 | <0.5 | <0.2 | <0.2 | <0.2 | <0.5 | <0.1 | <b>20.9</b>  |
|                        | TW2 | 5.16  | 1.68  | 1.39  | 7.66  | 1.42  | 0.40 | <0.5 | <0.2 | 1.60  | 4.50 | 1.62  | <0.5 | <0.5 | <0.2 | <0.2 | <0.2 | <0.5 | <0.1 | <b>25.4</b>  |
|                        | TW3 | 5.80  | 2.04  | 1.52  | 9.64  | 1.65  | 0.52 | <0.5 | <0.2 | 2.32  | 4.74 | 1.63  | <0.5 | <0.5 | <0.2 | <0.2 | <0.2 | <0.5 | <0.1 | <b>29.9</b>  |
|                        | TW4 | 5.06  | 1.80  | 1.20  | 6.04  | 1.18  | 0.30 | <0.5 | <0.2 | 1.91  | 1.87 | 2.34  | <0.5 | <0.5 | <0.2 | <0.2 | <0.2 | <0.5 | <0.1 | <b>21.7</b>  |
|                        | TW5 | 5.02  | 1.57  | 1.23  | 8.46  | 1.35  | 0.35 | <0.5 | <0.2 | 1.71  | 4.22 | 1.58  | <0.5 | <0.5 | <0.2 | <0.2 | <0.2 | <0.5 | <0.1 | <b>25.5</b>  |
|                        | TW6 | 4.62  | 1.44  | 1.18  | 6.80  | 1.26  | 0.31 | <0.5 | <0.2 | 1.25  | 2.26 | 1.41  | <0.5 | <0.5 | <0.2 | <0.2 | <0.2 | <0.5 | <0.1 | <b>20.5</b>  |
|                        | TW7 | 5.10  | 1.75  | 1.36  | 9.62  | 1.32  | 0.45 | <0.5 | <0.2 | 2.16  | 4.14 | 1.92  | <0.5 | <0.5 | <0.2 | <0.2 | <0.2 | <0.5 | <0.1 | <b>27.8</b>  |
| Barreled pure<br>water | BW1 | 0.27  | <0.2  | <0.2  | <0.1  | <0.5  | <0.1 | <0.5 | <0.2 | 0.00  | 0.00 | 0.00  | <0.5 | <0.5 | <0.2 | <0.2 | <0.2 | <0.5 | <0.1 | <b>0.3</b>   |
|                        | BW2 | 0.18  | <0.2  | <0.2  | <0.1  | <0.5  | <0.1 | <0.5 | <0.2 | 0.00  | 0.00 | 0.00  | <0.5 | <0.5 | <0.2 | <0.2 | <0.2 | <0.5 | <0.1 | <b>0.2</b>   |
|                        | BW3 | 0.40  | <0.2  | <0.2  | <0.1  | <0.5  | <0.1 | <0.5 | <0.2 | 0.00  | 0.00 | 0.00  | <0.5 | <0.5 | <0.2 | <0.2 | <0.2 | <0.5 | <0.1 | <b>0.8</b>   |
|                        | BW4 | 5.14  | 1.65  | 1.36  | 9.52  | 1.64  | 0.48 | <0.5 | <0.2 | 1.95  | 4.76 | 1.89  | <0.5 | <0.5 | <0.2 | <0.2 | <0.2 | <0.5 | <0.1 | <b>28.4</b>  |
|                        | BW5 | 6.32  | 1.91  | 1.17  | 6.10  | 1.04  | 0.25 | <0.5 | <0.2 | 1.11  | 2.94 | 1.39  | <0.5 | <0.5 | <0.2 | <0.2 | <0.2 | <0.5 | <0.1 | <b>22.2</b>  |

|                          |     |      |      |      |      |      |      |      |      |      |      |      |      |      |      |      |      |      |      |            |
|--------------------------|-----|------|------|------|------|------|------|------|------|------|------|------|------|------|------|------|------|------|------|------------|
|                          | BW6 | 0.92 | 0.00 | 0.00 | <0.1 | <0.5 | <0.1 | <0.5 | <0.2 | 0.00 | 0.00 | 0.00 | <0.5 | <0.5 | <0.2 | <0.2 | <0.2 | <0.5 | <0.1 | <b>1.1</b> |
| Bottled mineral<br>water | MW1 | 0.22 | <0.2 | <0.2 | <0.1 | <0.5 | <0.5 | <0.5 | <0.2 | 0.00 | 0.00 | 0.00 | <0.5 | <0.5 | <0.2 | <0.2 | <0.2 | <0.5 | <0.1 | <b>0.3</b> |
|                          | MW2 | 0.22 | <0.2 | <0.2 | <0.1 | <0.5 | <0.5 | <0.5 | <0.2 | 0.00 | 0.00 | 0.00 | <0.5 | <0.5 | <0.2 | <0.2 | <0.2 | <0.5 | <0.1 | <b>0.3</b> |
|                          | MW3 | 4.28 | 1.78 | 0.58 | <0.1 | 0.16 | <0.5 | <0.5 | <0.2 | 0.00 | 0.00 | 0.38 | <0.5 | <0.5 | <0.2 | <0.2 | <0.2 | <0.5 | <0.1 | <b>7.2</b> |

---
